# Supplementary material
Source: HighWire-hosted journal article supplement (http://thorax.bmjjournals.com/highwire/filestream/174071/field_highwire_adjunct_files/1/633251webonlyapp2.pdf)

**Figure E1**

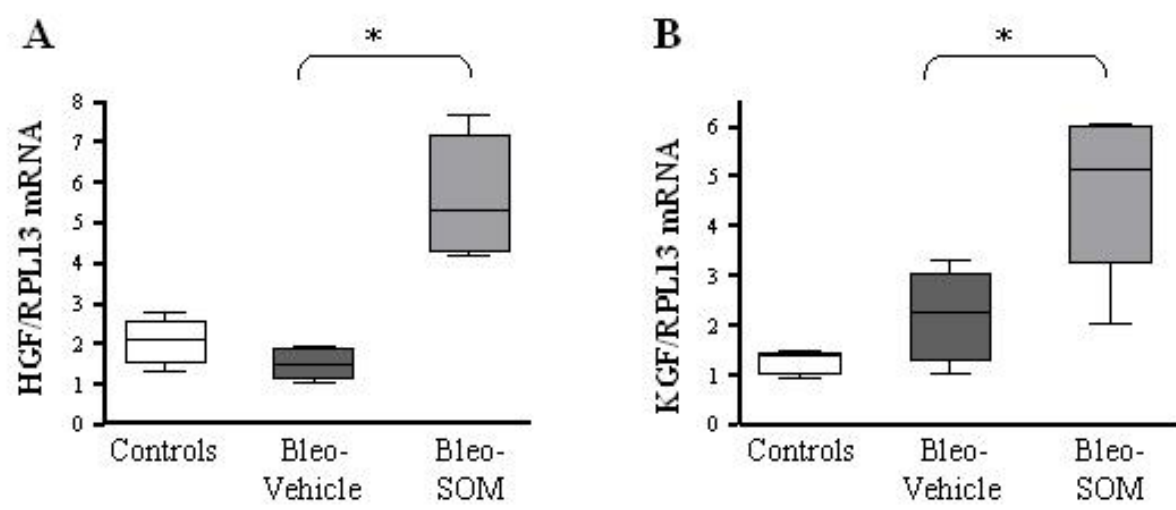

Supplement: 633251webonlyapp2.pdf [file 633251webonlyapp2.pdf]
